# Supplementary material for: Role of the Long Non-Coding RNA MAPT-AS1 in Regulation of Microtubule Associated Protein Tau (MAPT) Expression in Parkinson's Disease
Source: PubMed Central journal article supplement (PMC4919105; doi:10.1371/journal.pone.0157924), 2016-06-23
Supplement: pone.0157924.s001.pdf [file pone.0157924.s001.pdf]

**Table 1. PCR primers for validating changes in gene expression by semi-quantitative RT-PCR**

| <b>Gene Name</b> | <b>Primer Name</b> | <b>Sequence</b>        | <b>Predicted size (bp)</b> |
|------------------|--------------------|------------------------|----------------------------|
| <i>MAPT</i>      | MAPT-4repeat-RTF   | AGCAACGTCCAGTCCAAGTG   | 150                        |
| <i>MAPT</i>      | MAPT-4repeat-RTR   | ACCTCCTGGTTTATGATGGATG |                            |
| <i>MAPT</i>      | MAPT-total-RTF     | TGTGGCTCATTAGGCAACAT   | 91                         |
| <i>MAPT</i>      | MAPT-total-RTR     | ACTGGACTCTGTCCTTGAAGTC |                            |
| <i>MAPT-AS1</i>  | MAPT-AS1-RTF       | AGATGCACCTGCAGCCC      | 121                        |
| <i>MAPT-AS1</i>  | MAPT-AS1-RTR       | CCCGTCCTTGTTCTGACTCC   |                            |
| <i>EIDF4A2</i>   | EIDF4A2-RTF        | GGTCAGGGTCAAGTCGTGTT   | 135                        |
| <i>EIDF4A2</i>   | EIDF4A2-RTR        | CCCCTCTGCCAATTCTGTGA   |                            |
| <i>SDHA</i>      | SDHA-RTF           | TGGGAACAAGAGGGCATCTG   | 86                         |
| <i>SDHA</i>      | SDHA-RTR           | CCACCACTGCATCAAATTCATG |                            |

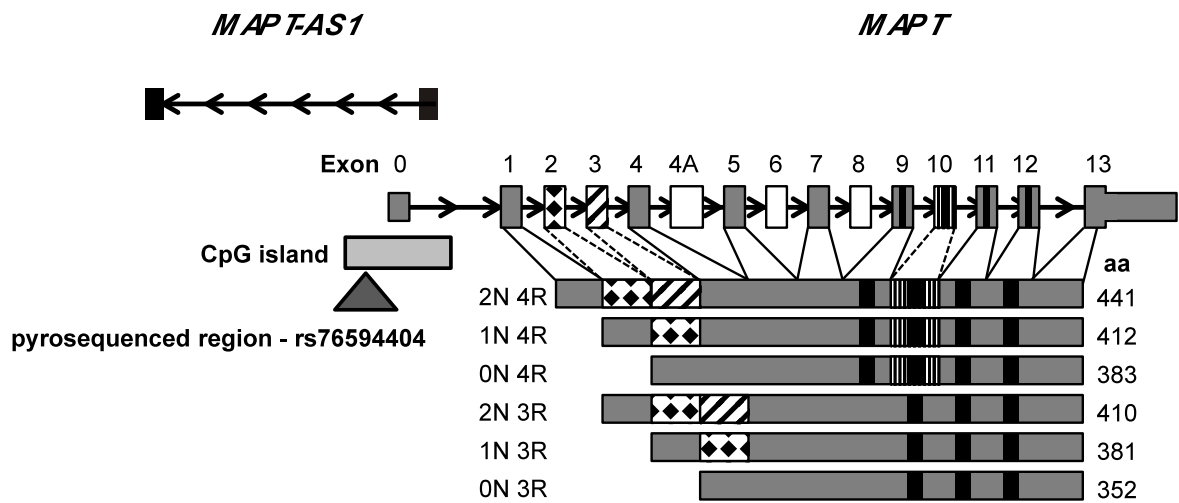

**Figure 1.** Schematic diagram of the *MAPT-AS1* and *MAPT* genes (not drawn to scale) and protein variants arising from alternative splicing. Relative orientations of the genes are indicated by arrows. The *MAPT* CpG island (light grey box) and the position of the H1/H2 *MAPT* haplotype tagging polymorphism (rs765994404) are also indicated. Alternatively spliced exons are indicated by dashed lines. Schematic of *MAPT* exons with their traditional notation, denoting exons present in all isoforms (grey), exons that are not present in adult central nervous system splice isoforms (white), and alternatively spliced exons 2 (checked), 3 (striped) & 10 (dotted). Microtubule-binding domains are depicted as vertical black bars. The six isoforms present in human brain are depicted below. Alternative splicing of exons 2 and 3 results in proteins with 0, 1 or 2 N-terminal inserts (ON, 1N, 2N), while exon 10 alternative splicing generates proteins with either 3 or 4 microtubule-binding repeats (3R or 4R).

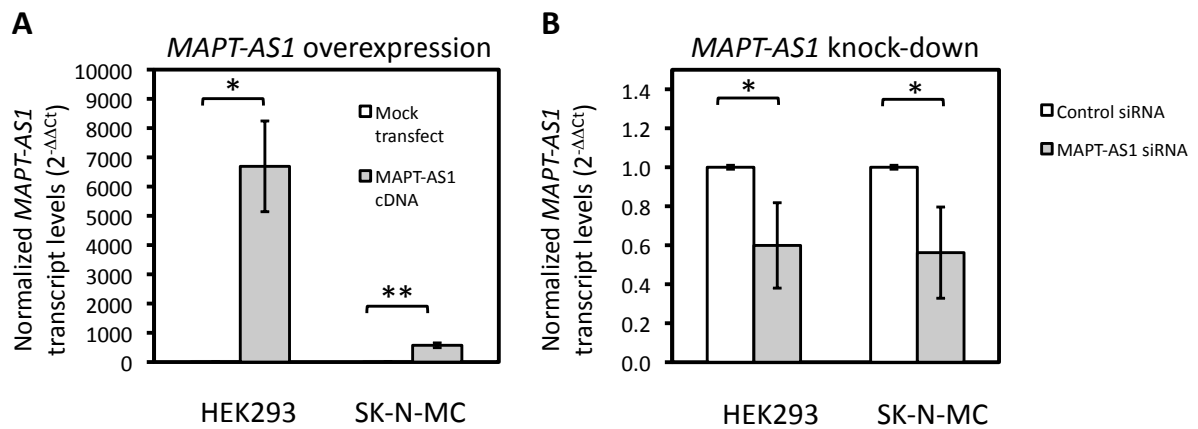

**Figure 2.** Relative changes in levels of *MAPT-AS1* transcripts ( $2^{-\Delta\Delta Ct}$ ) in HEK293 and SK-N-MC cells after (A) overexpression (grey columns) or (B) knock-down expression (grey columns) compared with control treatments (open columns). Note that for each independent experiment, the expression level of *MAPT-AS1* in the control cells is normalized to '1' and the change in *MAPT-AS1* in the treated cells adjusted accordingly. Error bars indicate standard error of the mean from 5 independent experiments. \*,  $p < 0.05$ ; \*\*  $p < 0.005$ .

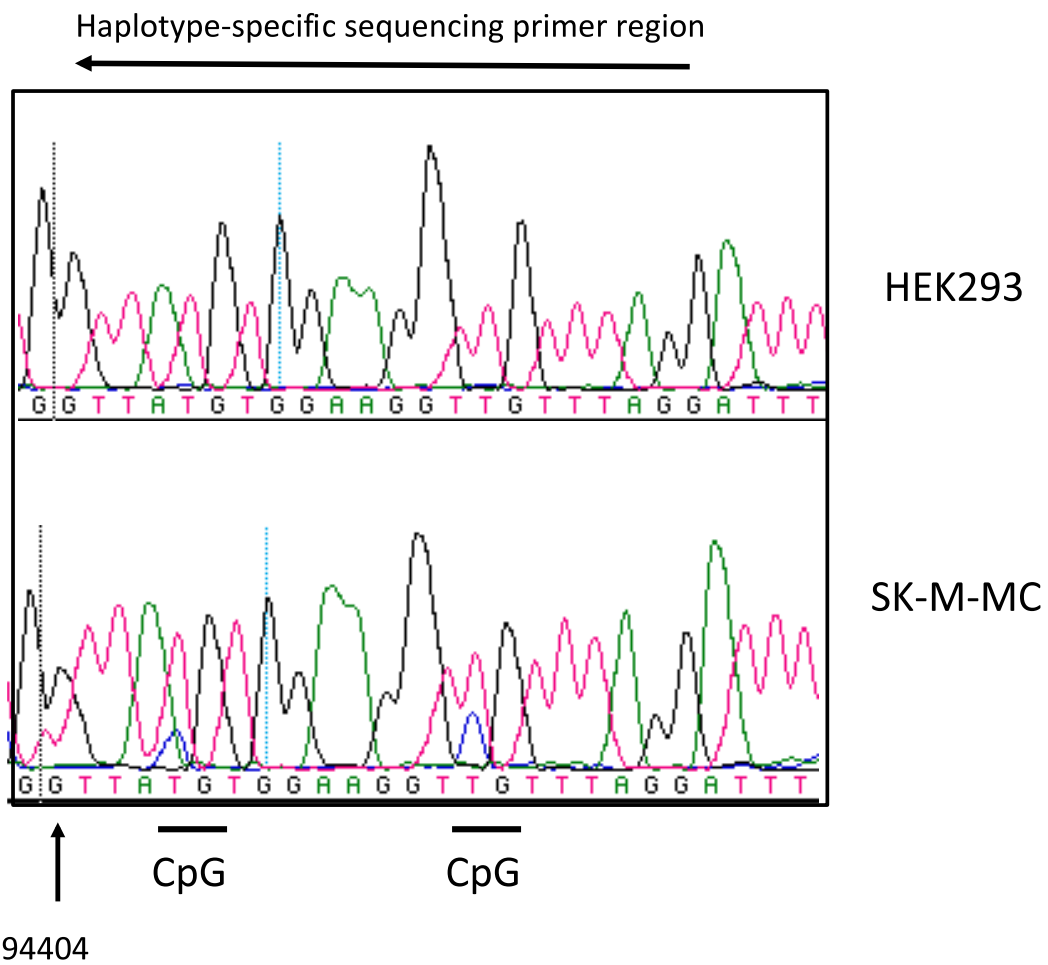

**Figure 3.** Electropherogram traces from Sanger sequencing of PCR products arising from amplification of bisulfite converted DNAs. The sequence data covers the primer binding site of the primer used to generate haplotype-specific DNA methylation data. Note the appropriate GT heterozygote genotype for rs76594404 for SK-N-MC cells. Also note the relatively high level of DNA methylation in SK-N-MC compared with HEK293 cells, as indicated by the height of the ‘C’ peaks at the two CpG sites.

## Methods

**SPSS Syntax 1** – To examine the relationship between dependent variable [- $\Delta$ Ct values of gene of interest] and independent variable [demographic data]. Repeat measure of gene expression are for the different brain regions [Brain\_regions] in each patient [PatientID].

MIXED [- $\Delta$ Ct value of gene of interest] WITH [demographic data]

/CRITERIA=CIN(95) MXITER(100) MXSTEP(10) SCORING(1)

SINGULAR(0.000000000001) HCONVERGE(0, ABSOLUTE) LCONVERGE(0,

ABSOLUTE) PCONVERGE(0.000001, ABSOLUTE)

/FIXED=Tissue\_pH | SSTYPE(3)

/METHOD=ML

/PRINT=G SOLUTION

/RANDOM=INTERCEPT | SUBJECT(PatientID) COVTYPE(VC)

/REPEATED=Brain\_region | SUBJECT(PatientID) COVTYPE(UN).

**SPSS Syntax 2-** To examine the relationship between dependent variable [- $\Delta$ Ct values of gene of interest] and independent variable [- $\Delta$ Ct values of potential regulator of gene expression] and adjusting for disease status [Disease\_coded] and relevant demographic covariates [demographic data]. Repeat measure of gene expression are for the different brain regions [Brain\_regions] in each patient [PatientID].

MIXED [- $\Delta$ Ct value of gene of interest] BY [Disease\_coded] WITH [ $\Delta$ Ct value of potential regulator of gene expression] [demographic data]

```

/CRITERIA=CIN(95)          MXITER(100)          MXSTEP(10)          SCORING(1)
SINGULAR(0.000000000001)  HCONVERGE(0,    ABSOLUTE)  LCONVERGE(0,
ABSOLUTE) PCONVERGE(0.000001, ABSOLUTE)

/FIXED=[demographic data] [Disease_coded] [ $\Delta$ Ct value of potential regulator of gene
expression] [Disease_coded* $\Delta$ Ct value of potential regulator of gene expression |
SSTYPE(3)

/METHOD=ML

/PRINT=G SOLUTION

/RANDOM=INTERCEPT | SUBJECT(PatientID) COVTYPE(VC)

/REPEATED=Brain_region | SUBJECT(PatientID) COVTYPE(UN).

```

**SPSS Syntax 3** – General Linear Model (GLM) analyses for the generation of the graphical output to illustrate the relationship between dependent variables [ $-\Delta$ Ct values of gene of interest] for all four brain regions [ACC = anterior cingulate cortex, CER = cerebellum, PUT = putamen, VC = visual cortex] between controls and disease samples [Disease\_coded], and adjusting for relevant covariates [demographic data].

```

GLM ACC_ $[-\Delta$ Ct value of gene of interest] CER_ $[-\Delta$ Ct value of gene of interest] PUT_ $[-\Delta$ Ct
value of gene of interest] VC_ $[-\Delta$ Ct value of gene of interest] BY [Disease_coded] WITH
[demographic data]

/WSFACTOR=factor1 4 Polynomial

/METHOD=SSTYPE(3)

/PLOT=PROFILE(Disease_coded*factor1)

/CRITERIA=ALPHA(.05)

/WSDESIGN= factor1

```

/DESIGN= [Disease\_coded] [demographic data]
